# Supplementary material for: Liquid-Phase Hydrogenation of 1-Phenyl-1-propyne on the Pd1Ag3/Al2O3 Single-Atom Alloy Catalyst: Kinetic Modeling and the Reaction Mechanism
Source: MDPI journal article supplement (doi:10.3390/nano11123286), 2021-12-03
Supplement: s1 [file s1]

Supplementary Material

# Liquid-Phase Hydrogenation of 1-phenyl-1-propyne on the Pd<sub>1</sub>Ag<sub>3</sub>/Al<sub>2</sub>O<sub>3</sub> Single-Atom Alloy Catalyst: Kinetic Modeling and the Reaction Mechanism

Alexander V. Rassolov <sup>1</sup>, Igor S. Mashkovsky <sup>1,\*</sup>, Galina N. Baeva <sup>1</sup>, Galina O. Bragina <sup>1</sup>, Nadezhda S. Smirnova <sup>1</sup>, Pavel V. Markov <sup>1</sup>, Andrey V. Bukhtiyarov <sup>2</sup>, Johan Wärnå <sup>3</sup>, Alexander Yu. Stakheev <sup>1,\*</sup> and Dmitry Yu. Murzin <sup>3,\*</sup>

<sup>1</sup> N.D. Zelinsky Institute of Organic Chemistry RAS, Leninsky Prospekt 47, 119991 Moscow, Russia; brandon\_hitt@mail.ru (A.V.R.); bg305@ioc.ac.ru (G.N.B.); bragina@ioc.ac.ru (G.O.B.); felisine@gmail.com (N.S.S.); markovp@mail.ru (P.V.M.)

<sup>2</sup> Synchrotron Radiation Facility SKIF, Borekov Institute of Catalysis SB RAS, Nikol'skiy Prospekt 1, 630559 Kol'tsovo, Russia; avb@catalysis.ru

<sup>3</sup> Laboratory of Industrial Chemistry and Reaction Engineering, Faculty of Science and Engineering, Åbo Akademi University, FI-20500 Turku, Finland; johan.warna@abo.fi

\* Correspondence: im@ioc.ac.ru (I.S.M.); st@ioc.ac.ru (A.Y.S.); dmitry.murzin@abo.fi (D.Y.M.)

**Citation:** Rassolov, A.V.; Mashkovsky, I.S.; Baeva, G.N.; Bragina, G.O.; Smirnova, N.S.; Markov, P.V.; Bukhtiyarov, A.V.; Wärnå, J.; Stakheev, A.Y.; Murzin, D.Y. Liquid-Phase Hydrogenation of 1-phenyl-1-propyne on the Pd<sub>1</sub>Ag<sub>3</sub>/Al<sub>2</sub>O<sub>3</sub> Single-Atom Alloy Catalyst: Kinetic Modeling and the Reaction Mechanism. *Nanomaterials* **2021**, *11*, 3286. <https://doi.org/10.3390/nano11123286>

Academic Editor: Patricia Concepción

Received: 31 October 2021  
Accepted: 29 November 2021  
Published: 3 December 2021

**Publisher's Note:** MDPI stays neutral with regard to jurisdictional claims in published maps and institutional affiliations.

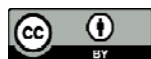

**Copyright:** © 2021 by the authors. Licensee MDPI, Basel, Switzerland. This article is an open access article distributed under the terms and conditions of the Creative Commons Attribution (CC BY) license (<http://creativecommons.org/licenses/by/4.0/>).

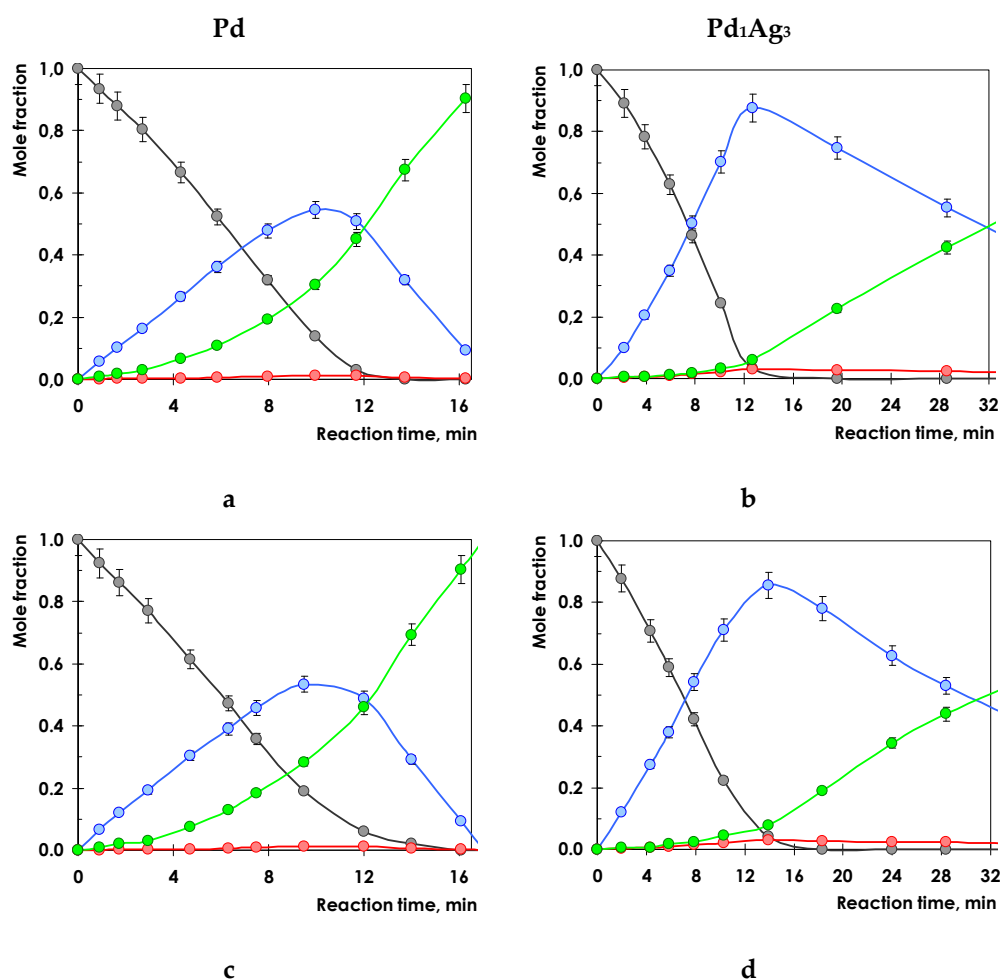

**Figure S1.** Product distribution for Pd and Pd<sub>1</sub>Ag<sub>3</sub> catalysts – after the first (a,b) and after the fifth (c,d) catalytic cycles. Conditions:  $T = 25^{\circ}\text{C}$ ,  $P(\text{H}_2) = 5 \text{ bar}$ ,  $m(\text{Pd}) = 1.5 \text{ mg}$ ,  $m(\text{Pd}_1\text{Ag}_3) = 7.5 \text{ mg}$ ,  $V_{\text{C}_6\text{H}_{14}} = 6 \text{ mL}$ . The error bars are  $\pm 1$  standard deviation. Black circles – 1-phenyl-1-propyne, blue circles – *cis*-propenylbenzene, red circles – *trans*-propenylbenzene; green circles – propylbenzene.

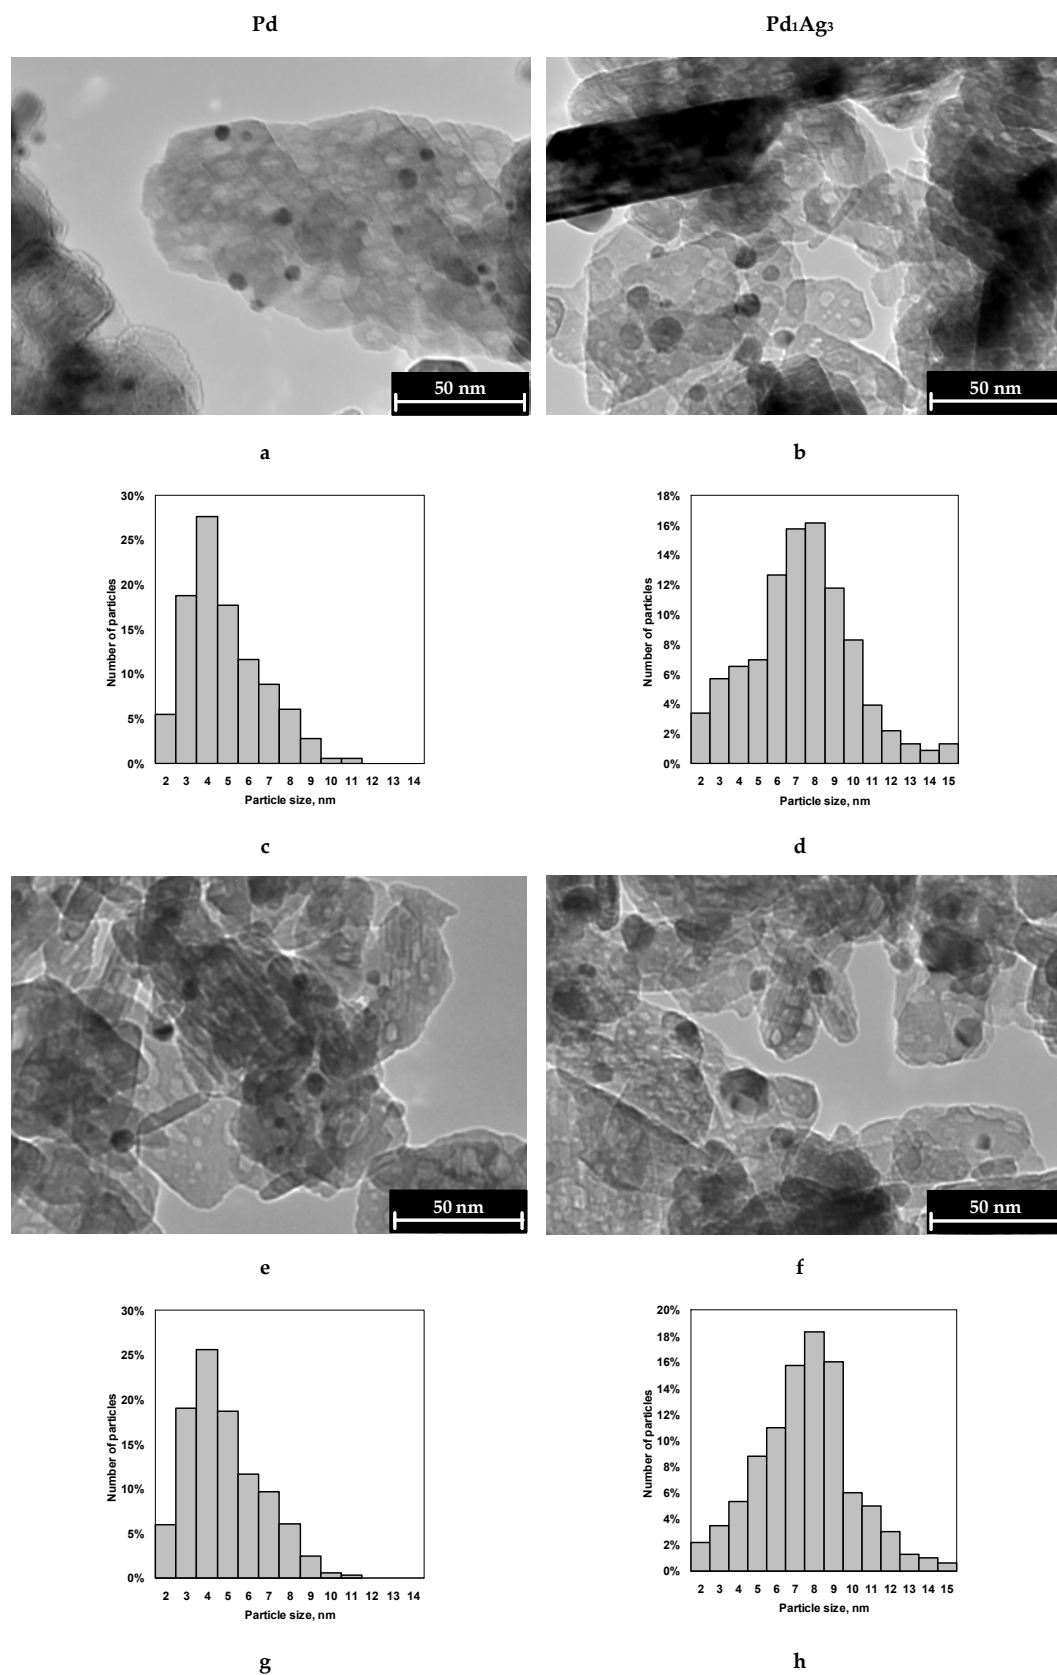

**Figure S2.** Representative TEM micrographs of Pd and Pd<sub>1</sub>Ag<sub>3</sub> catalysts after the first (a,b) and after the fifth (e,f) catalytic cycles. Insets (c) and (d) illustrates particle size distribution of Pd and Pd<sub>1</sub>Ag<sub>3</sub> catalysts after the first catalytic cycle and (g) and (h) - after the fifth one. The average size of particles is ca. 4 nm for Pd and ca. 8 nm for Pd<sub>1</sub>Ag<sub>3</sub>.
